# Supplementary material
Source: Springer Nature journal article supplement (https://www.springermedizin.de/resource/supplementary/12902_2012_123_MOESM2_ESM.pdf/9515594)

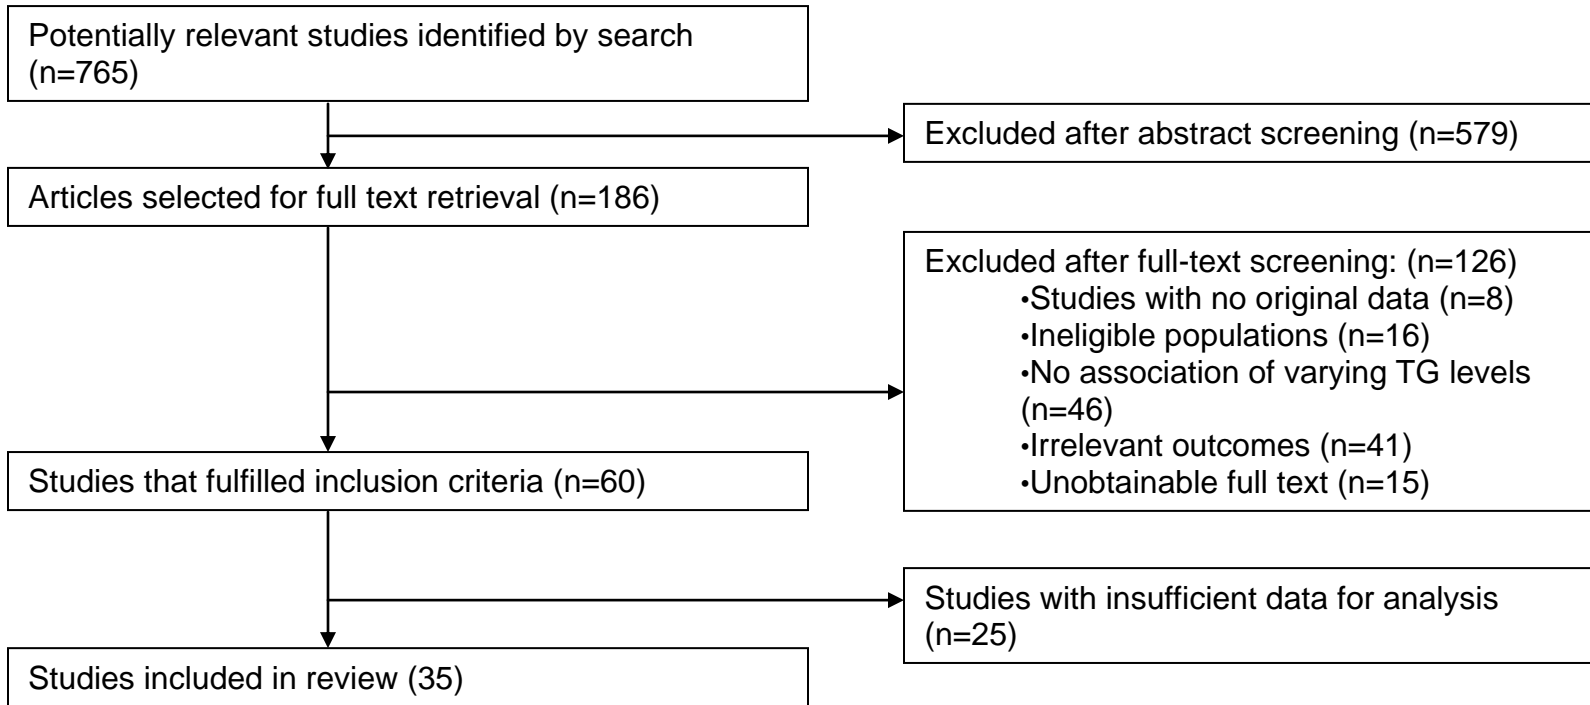

Supplement: MOESM2 [file 9515594]
